# Supplementary material
Source: PubMed Central journal article supplement (PMC6407710)
Supplement: NIHMS1010568-supplement-SI.pdf [file NIHMS1010568-supplement-SI.pdf]

1 **Supplementary Material for "Predicting the metabolic capabilities of *S. elongatus* PCC 7942 adapted to different**  
 2 **light regimes"**

3 Authors: Jared T. Broddrick, David G. Welkie, Denis Jallet, Susan S. Golden, Graham Peers and Bernhard O. Palsson

4 The following Supporting Information is available for this article:

5 Modeling files can be found at <http://systemsbiology.ucsd.edu/Downloads/SupplementalData>

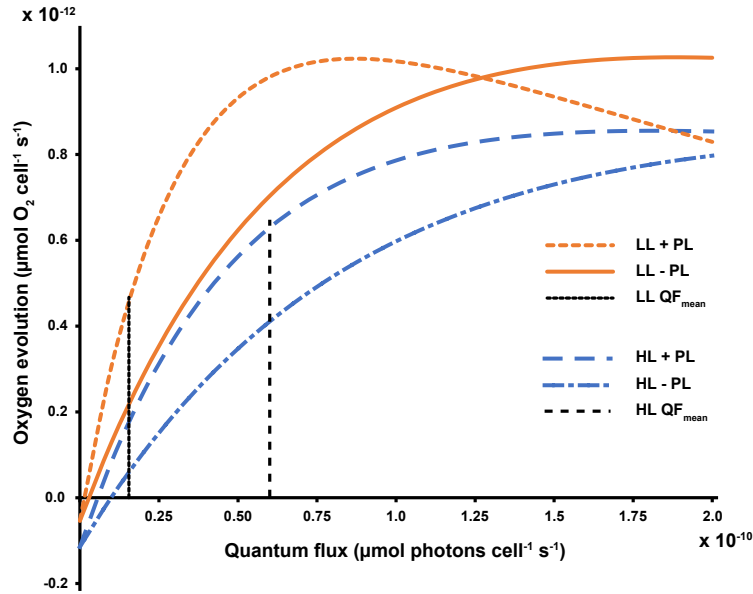

**Fig. S1.** Effect of path length correction on quantum flux calculations *S. elongatus*. Accounting for cell shading in the determination of quantum flux affects the calculated oxygen evolution rate at the experimental conditions. +/- PL refers to plots with (+) or without (-) accounting for path length. Abbreviations. LL: low light, HL: high light, PL: path length, QF: quantum flux.

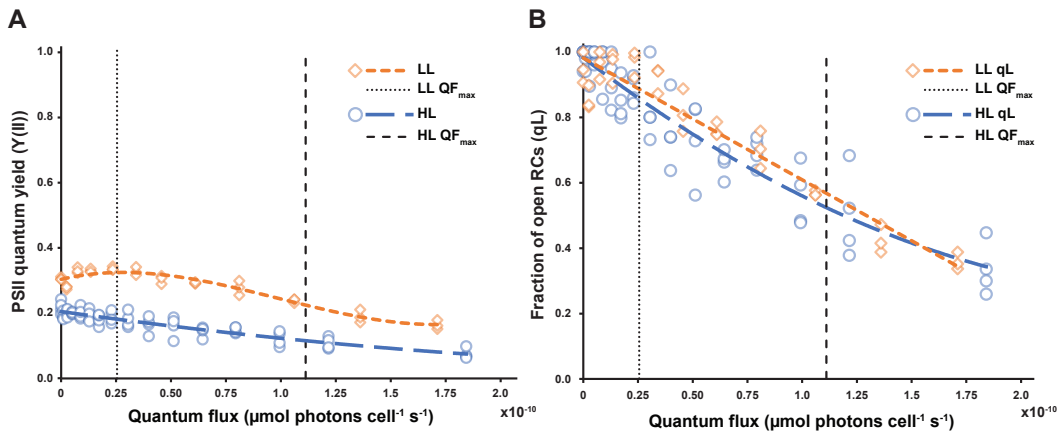

**Fig. S2.** Chlorophyll fluorescence parameters versus quantum flux for *S. elongatus*. (A) Quantum yield of photosystem II (PSII) versus QF curves. The maximal quantum yield ( $F_v/F_m$ ) is equal to the y-intercept of the curves. (B) Fraction of open reaction centers (RCs) versus quantum flux. Vertical dashed lines represent the maximum quantum flux received by the cultures at the experimental irradiance. Abbreviations. LL: low light, HL: high light, QF: quantum flux.

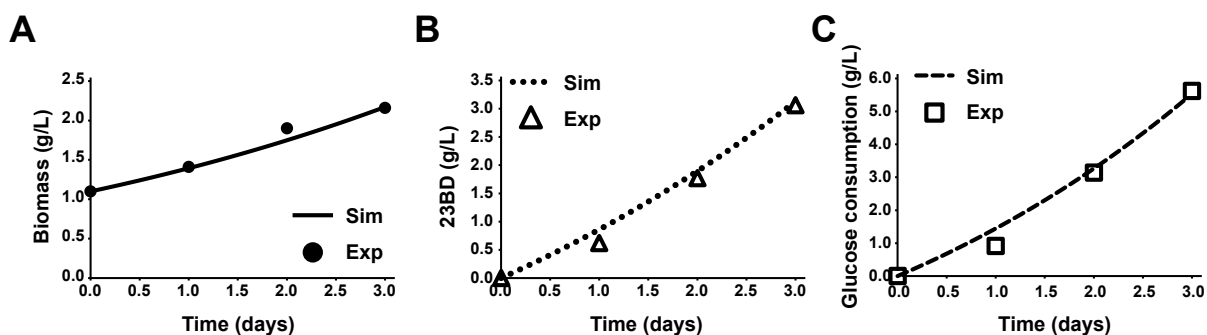

**Fig. S3.** In silico recapitulation of an *S. elongatus* strain designed for 2,3-butanediol production. (A) Biomass, (B) 2,3-butanediol (23BD) production and (C) glucose consumption over the first 3 days of culturing. Experimental data points (Exp) were taken from published values (1). Simulations were set with the biomass production at 20% of the maximum and a glucose uptake rate of  $0.27 \text{ mmol glc gDW}^{-1} \text{ h}^{-1}$

**Table S1. Content edits to *iJB785* in the construction of *iJB792*.**

| Reaction ID | Reaction name                              | Notes                                                                                      |
|-------------|--------------------------------------------|--------------------------------------------------------------------------------------------|
| MPTSS       | Molybdopterin synthase sulfurylase         | Added. Molybdopterin cofactor biosynthesis.                                                |
| MOADSUX     | MoaD sulfuration (nadh, assumed)           | Added. Molybdopterin cofactor biosynthesis.                                                |
| GTPC        | GTP 3,8-cyclase                            | Added. Molybdopterin cofactor biosynthesis.                                                |
| CPMPS       | Cyclic pyranopterin monophosphate synthase | Added. Molybdopterin cofactor biosynthesis.                                                |
| MPTS        | Molybdopterin synthase                     | Added. Molybdopterin cofactor biosynthesis.                                                |
| MPTAT       | Molybdopterin adenylyltransferase          | Added. Molybdopterin cofactor biosynthesis.                                                |
| MOCOS       | Molybdenum cofactor synthase               | Added. Molybdopterin cofactor biosynthesis.                                                |
| MDH         | Malate dehydrogenase                       | Added. Based on fluxomics data (2). Gene reaction rule unknown.                            |
| ORNNTA      | Ornithine transaminase                     | Deleted. Gene model results in a truncated protein that appears to be inactive in vivo (3) |

- 6 1. Kanno M, Carroll AL, Atsumi S (2017) Global metabolic rewiring for improved CO<sub>2</sub> fixation and chemical production in cyanobacteria. *Nature Communications* 8:14724.
- 7 2. Jazmin LJ, et al. (2017) Isotopically nonstationary <sup>13</sup>C flux analysis of cyanobacterial isobutyraldehyde production. *Metabolic engineering* 42:9–18.
- 8 3. Broddrick JT, et al. (2016) Unique attributes of cyanobacterial metabolism revealed by improved genome-scale metabolic modeling and essential gene analysis. *Proceedings of the National Academy of Sciences* 113(51):E8344–E8353.
- 9
